# Supplementary material for: Neural correlates and reinstatement of recent and remote memory in children and young adults
Source: eLife. 2025 Dec 5;12:RP89908. doi: 10.7554/eLife.89908 (PMC12680376; doi:10.7554/eLife.89908)
Supplement: Supplementary file 5. [file elife-89908-supp5.docx]

Supplementary File 5

*Full statistical overview of LME model for univariate analysis (includes only ROI that show above or below zero upregulation).*

|  | **Main Effect**  **of Group** | | **Main Effect**  **of Session** | | **Group x Session Interaction** | |  |
| --- | --- | --- | --- | --- | --- | --- | --- |
| ***Regions of Interest*** | *F(DF)* | *p* | *F(DF)* | *p* | *F(DF)* | p | *R2* |
| Parahippocampal Gyrus Posterior | 2.97(1,83) | .088(.106) | 2.48(1,100) | .118(.142) | 9.54(1,83) | **.002(.012)** | .200⊥ |
| Medial Prefrontal Cortex | 7.61(1,86) | **.007(.014)** | .42(1,99) | .517(.517) | 1.16(1,83) | .284(.284) | .369⊥ |
| Ventrolateral Prefrontal Cortex | 31.35(1,82) | **<.001(<.001)** | 10.68(1,99) | **.001(.003)** | 1.61(1,83) | .207(.248) | .309⊥ |
| Cerebellum | 1.54(1,161) | .215(.215) | 4.67(1,161) | .036(.054**)** | 7.68(1,161) | **.006(.018)** | .100∩ |
| Precuneus | 5.09(1,161) | **.025(.037)** | 6.50(1,161) | **.011(.022)** | 1.61(1,161) | .205(.248) | .099∩ |
| Lateral Occipital Cortex | 9.12(1,82) | **.003(.009)** | 16.76(1,97) | **<.001(<.001)** | 6.42(1,81) | **.013(.026)** | .324⊥ |

|  | **Main Effect**  **of Sex** | | **Main Effect**  **of Handedness** | | **Main Effect**  **of IQ** | | **Main Effect**  **Of Reaction Time** | |
| --- | --- | --- | --- | --- | --- | --- | --- | --- |
| ***Regions of Interest*** | *F(DF)* | *p* | *F(DF)* | *p* | *F(DF)* | p | *F(DF)* | *p* |
| Parahippocampal Gyrus Posterior | 1.26(1,84) | .263 | .03(1,93) | .962 | 1.281,84) | **.**259 | .09(1,155) | .764 |
| Medial Prefrontal Cortex | .62(1,87) | .430 | .50(1,95) | .607 | 5.16(1,87) | **.024** | .22(1,160) | .635 |
| Ventrolateral Prefrontal Cortex | 1.11(1,83) | .294 | .71(1,92) | .494 | .09(1,83) | .764 | .20(1,154) | .654 |
| Cerebellum | 3.15(1,161) | .077 | .21(1,161) | .806 | .781(1,161) | .378 | .11(1,161) | .741 |
| Precuneus | .35(1,161) | .553 | .20(1,161) | .817 | .08(1,161) | .776 | .137(1,161) | .712 |
| Lateral Occipital Cortex | .10(1,83) | .752 | .76(1,92) | .468 | 3.04(1,83) | .084 | .005(1,159) | .944 |

*Notes.* *Notes.* Subject was included as random effect. Group (children, young adults), Session (Day 1 remote > recent, Day 14 remote > recent), and their interaction were included as fixed effect. The following reference levels where used: for Session – Day 1; for Group – Children; F – F-value; DF – degrees of freedom; p – p-value; FDR_adj – False Discovery Rate adjusted; R2 – amount of variance explained by the model (∩- marginal; ⊥ - conditional). Type III Analysis of Variance Table with Satterthwaite’s method. *p < .05; ** < .01, *** < .001 (significant difference). All p-values of main and interactions effects were FDR-adjusted for multiple comparisons.
