# Supplementary material for: Neural correlates and reinstatement of recent and remote memory in children and young adults
Source: eLife. 2025 Dec 5;12:RP89908. doi: 10.7554/eLife.89908 (PMC12680376; doi:10.7554/eLife.89908)
Supplement: Supplementary file 6. [file elife-89908-supp6.docx]

**Supplementary File 6**

*Statistical overview of the main and interaction effects of the linear mixed effects models recent and remote univariate results of correctly recognized items.*

|  | **Hippocampus Anterior** | | **Hippocampus Posterior** | | **Parahippocampal Cortex Anterior** | |
| --- | --- | --- | --- | --- | --- | --- |
|  | *F(DF)* | *p-value* | *F(DF)* | *p-value* | *F(DF)* | *p-value* |
| Delay: (Recent > Remote) | 3.62(231) | .058 | 2.17(234) | .142 | 1.70(227) | .194 |
| Group: (Adults > Children) | .01(80) | .912(.912) | **5.62(85)** | **.020(.060)** | 4.77(76) | .030(.060) |
| Session: (Day1> Day14) | 2.65(253) | .106 | 1.24(253) | .267 | 1.48(250) | .225 |
| Delay x Group | .001(253) | .977 | .155(234) | .694 | .000(227) | .994 |
| Delay x Session | .462(253) | .490 | .172(234) | .679 | .110(227) | .740 |
| Group x Session | .486(253) | .486 | .670(253) | .414 | .206(250) | .650 |
| Delay x Group x Session | .022(231) | .880 | .000(234) | .990 | .215(222) | .643 |
|  | **Medial Prefrontal Cortex** | | **Precuneus** | | **Retrosplenial Cortex** | |
| Delay: (Recent > Remote) | 6.82(235) | .009() | 15.14(235) | .0001() | .49(229) | .484 |
| Group: (Adults > Children) | 7.86(85) | .006() | .959(84) | **.303(.)** | 3.22(80) | **.076(.101)** |
| Session: (Day1> Day14) | 17.74(256) | <.001 | 9.49(256) | .002 | .306(247) | .581 |
| Delay x Group | 6.89 (235) | .009 | 2.87(235) | .091 | .034(229) | .853 |
| Delay x Session | .873(235) | .351() | 4.74(235) | .030(.) | .879(229) | .340 |
| Group x Session | 6.75(256) | .009 | .196(256) | .657 | 2.07(248) | .152 |
| Delay x Group x Session | .477(235) | .490() | 1.29(233) | .256(.) | 5.756(229) | .017 |
|  | **Ventrolateral Prefrontal Cortex** | | **Cerebellum** | | **Parahippocampal Cortex Posterior** | |
| Delay: (Recent > Remote) | 80.52(231) | <.001() | 28.66(232) | <.001(<.001) | 50.25(233) | <.001(<.001) |
| Group: (Adults > Children) | 5.43(83) | .022() | .808(81) | .371() | 1.55(84) | .217() |
| Session: (Day1> Day14) | 11.52(248) | <.001 | .002(254) | .965 | 34.79(251) | <.001 |
| Delay x Group | 27.45(231) | <.001 | .783(232) | .377 | 2.59(233) | .109 |
| Delay x Session | 10.82(231) | .001() | 4.29(232) | .039() | 1.87(233) | .172() |
| Group x Session | .004(248) | .948 | 1.24(248) | .266 | .671(251) | .414 |
| Delay x Group x Session | 1.275(231) | .260() | 3.99(232) | .047() | 4.218(233) | .041() |
|  | **Lateral Occipital Cortex** | |  | | | |
| Delay: (Recent > Remote) | 21.44(233) | <.001(<.001) |  |  |  |  |
| Group: (Adults > Children) | 30.07(86) | <.001 |  |  |  |  |
| Session: (Day1> Day14) | 46.66(246) | <.001 |  |  |  |  |
| Delay x Group | 3.28(233) | .071 |  |  |  |  |
| Delay x Session | 7.46(233) | .007() |  |  |  |  |
| Group x Session | 1.18(246) | .278 |  |  |  |  |
| Delay x Group x Session | 1.29(233) | .257(.) |  |  |  |  |

*Notes.* Subject was included as a random effect. Group (children, young adults), Delay ( recent, remote), Session (Day1, Day 14), and their interaction were included as fixed effect. The following reference levels where used: for Delay, recent; for Group, Children; F – F-value; DF – degrees of freedom; p – p-value; Type III Analysis of Variance Table with Satterthwaite's method. *p < .05; ** <.01, ***<.001 (significant difference).
