# Supplementary material for: Neural correlates and reinstatement of recent and remote memory in children and young adults
Source: eLife. 2025 Dec 5;12:RP89908. doi: 10.7554/eLife.89908 (PMC12680376; doi:10.7554/eLife.89908)
Supplement: Supplementary file 8. [file elife-89908-supp8.docx]

Supplementary File 8

*Full statistical overview of LME model for univariate analysis (sub-sampled to those participants who reached accuracy criteria after 2 encoding loops).*

|  | **Main Effect**  **of Group** | | | **Main Effect**  **of Session** | | **Group x Session Interaction** | |  |
| --- | --- | --- | --- | --- | --- | --- | --- | --- |
| ***Regions of Interest*** | *F(DF)* | | *p* | *F(DF)* | *p* | *F(DF)* | p | *R2* |
| Hippocampus Anterior | .02(1,125) | .894 | | .931(1,125) | .336(.707) | .701(1,125) | .404(.494) | .042⊥ |
| Hippocampus Posterior | 1.62(1,125) | | .206( | 3.51(1,125) | .063(.939) | 1.73(1,125) | .191(.607) | .141⊥ |
| Parahippocampal Gyrus Anterior | .147(1,125) | | .702 | .496(1,125) | .482(.707) | .110(1,125) | .740(.680) | .051∩ |
| Parahippocampal Gyrus Posterior | 5.22(1,61) | | .021 | .440(1,71) | .509(.330) | 22.05(1,58) | <.001(.095) | .482⊥ |
| Medial Prefrontal Cortex | 11.25(1,66) | | .0013(.293) | .036(1,75) | .851.568) | .224(1,69) | .638(.953) | .468⊥ |
| Ventrolateral Prefrontal Cortex | 14.93(1,65) | | **<.001(<.001)** | 9.91(1,79) | **.002(.035)** | 1.48(1,65) | .228(.494) | .313⊥ |
| Cerebellum | 5.60(1,125) | | .019(.816) | 1.09(1,125) | .299(.607) | 15.03(1,125) | <.001(.060) | .204∩ |
| Retrosplenial Cortex | .01(1,125) | | .936(.877) | 7.06(1,125) | .009(.568) | 14.40(1,137) | <.001(.060) | .150∩ |
| Precuneus | 4.51(1,65) | | .038(.790) | 13.41(1,79) | .0005(.330) | 5.60(1,65) | .021(.194) | .171∩ |
| Lateral Occipital Cortex | 8.81(1,64) | | .004(.095) | 16.04(1,77) | **.0001(.02)** | 4.73(1,64) | .033(.060) | .290⊥ |

*Notes.* *Notes.* Subject was included as random effect. Group (children, young adults), Session (Day 1 remote > recent, Day 14 remote > recent), and their interaction were included as fixed effect. The following reference levels where used: for Session – Day 1; for Group – Children; F – F-value; DF – degrees of freedom; p – p-value; FDR_adj – False Discovery Rate adjusted; R2 – amount of variance explained by the model (∩- marginal; ⊥ - conditional). Type III Analysis of Variance Table with Satterthwaite’s method. *p < .05; ** < .01, *** < .001 (significant difference). All p-values of main and interactions effects were FDR-adjusted for multiple comparisons.
