# Supplementary material for: Neural correlates and reinstatement of recent and remote memory in children and young adults
Source: eLife. 2025 Dec 5;12:RP89908. doi: 10.7554/eLife.89908 (PMC12680376; doi:10.7554/eLife.89908)
Supplement: Supplementary file 9. [file elife-89908-supp9.docx]

Supplementary File 9

*Statistical overview of the main and interaction effects of the linear mixed effects model for scene-specific reinstatement.*

|  | **Main Effect**  **of Group** | | **Main Effect**  **of Session** | | **Group x Session Interaction** | | **Main Effect**  **of BOLD activation** | |  |
| --- | --- | --- | --- | --- | --- | --- | --- | --- | --- |
| ***Regions of Interest*** | *F(DF)* | *p* | *F(DF)* | *p* | *F(DF)* | *p* | *F(DF)* | *p* | *R2* |
| HCa | 27.21(1,86) | **<.001** | 100.70(2,159) | **<.001** | .94(2,159) | .393 | .92(1,226) | .339 | .411 |
| HCp | 27.19(1,87) | **<.001** | 98.18(2,159) | **<.001** | 1.71(2,158) | .183 | .97(1,240) | .324 | .417 |
| PHGa | 23.14(1,87) | **<.001** | 97.74(2,159) | **<.001** | 1.62(2,159) | .201 | 1.05(1,221) | .307 | .397 |
| PHGp | 15.70(1,82) | **<.001** | 94.40(2,163) | **<.001** | 1.85(2,155) | .161 | .25(1,240) | .619 | .371 |
| mPFC | 8.89(1,90) | **.0044** | 72.811(2,161) | **<.001** | .935(2,152) | .395 | 2.24(1,221) | .136 | .634 |
| vlPFC | 15.18(1,90) | **<.001** | 71.36(2,172) | **<.001** | 1.23(2,165) | .295 | .003(1,242) | .955 | .591 |
| CE | 9.54(1,87) | **.0038** | 59.99(2,166) | **<.001** | 1.17(2,162) | .313 | .679(1,228) | .411 | .520 |
| RSC | 9.27(1,89) | **.0038** | 79.40(2,162) | **<.001** | 1.86(2,162 | .159 | .101(1,242) | .751 | .564 |
| PC | 11.35(1,85) | **.0016** | 74.33(2,161) | **<.001** | 1.57(1,160) | .190 | .008(1,223) | .925 | .580 |
| LOC | 1.22(1,100) | .271 | 64.96(2,167) | **<.001** | 1.05(2,162) | .350 | 1.33(1,220) | .249 | .523 |

*Notes.* Subject was included as a random effect. Group (children, young adults), Delay ( recent, remote (Day 1), remote (Day 14)), and their interaction were included as fixed effect. The following reference levels where used: for Delay, recent; for Group, Children; F – F-value; DF – degrees of freedom; p – p-value; FDR_adj – False Discovery Rate adjusted; R2 – amount of variance explained by the model (Stoffel et al., 2021); mPFC – medial prefrontal cortex; vlPFC – ventrolateral prefrontal cortex; HCa – anterior hippocampus; HCp – posterior hippocampus; PHGa – anterior parahippocampal cortex; PHGp – posterior parahippocampal cortex; CE – cerebellum; PC – precuneus; RSC – retrosplenial cortex; LOC – lateral occipital cortex.. Type III Analysis of Variance Table with Satterthwaite's method. *p < .05; ** < .01, *** < .001 (significant difference). All main and interactions p-values were FDR-adjusted for multiple comparisons. All main and interactions p-values were FDR-adjusted for multiple comparisons.
