# Supplementary material for: Neural correlates and reinstatement of recent and remote memory in children and young adults
Source: eLife. 2025 Dec 5;12:RP89908. doi: 10.7554/eLife.89908 (PMC12680376; doi:10.7554/eLife.89908)
Supplement: Supplementary file 17. [file elife-89908-supp17.docx]

**Supplementary File 17**

*Statistical overview of the main and interaction effects of the linear mixed effects models* ***for remote > recent*** *univariate results for correctly recognized items (based on the pipeline without global signal).*

|  | **Main Effect**  **of Group** | | **Main Effect**  **of Session** | | **Group x Session Interaction** | |  |
| --- | --- | --- | --- | --- | --- | --- | --- |
| ***Regions of Interest*** | *F(DF)* | *p* | *F(DF)* | *p* | *F(DF)* | p | *R2* |
| Hippocampus Anterior | .002(1,161) | .963(.956) | .081(1,161) | .776(.862) | .034(1,161) | .853(.930) | .01∩ |
| Hippocampus Posterior | .151(1,161) | .698(.893) | .528(1,161) | .468(.669) | .006(1,161) | .930(.930) | .04∩ |
| Parahippocampal Gyrus Anterior | .153(1,161) | .696(.893) | .01(1,161) | .936(.936) | .013(1,161) | .910(.930) | .013∩ |
| Parahippocampal Gyrus Posterior | .898(1,83) | .345(.690) | 3.31(1,85) | .071(.236) | 3.03(1,85) | .085(.230) | .052⊥ |
| Medial Prefrontal Cortex | 2.20(1,83) | .142(.460) | 2.38(1,85) | .125(.213) | .374(1,85) | .542(.774) | .083⊥ |
| Ventrolateral Prefrontal Cortex | 20.37(1,80) | **<.001(<.001)** | 8.70(1,107) | **.004(.02)** | .921(1,83) | .340(.675) | .269⊥ |
| Cerebellum | 0.08(1,161) | .784(.893) | 1.64(1,161) | .202(.404) | 3.07(1,161) | .082(.230) | .063∩ |
| Retrosplenial Cortex | .06(1,161) | .804(.893) | .084(1,161) | .773(.862) | 2.87(1,161) | .092**(.230)** | .036∩ |
| Precuneus | 1.78(1,161) | .184(.460) | .568(1,161) | .452(.669) | .696(1,161) | .405(.675) | .045∩ |
| Lateral Occipital Cortex | 4.53(1,88) | .036(.180) | 13.64(1,111) | **<.001(<.001)** | 3.62(1,88) | .060(.230) | .297⊥ |

|  | **Main Effect**  **of Sex** | | **Main Effect**  **of Handedness** | | **Main Effect**  **of IQ** | | **Main Effect**  **Of Reaction Time** | |
| --- | --- | --- | --- | --- | --- | --- | --- | --- |
| ***Regions of Interest*** | *F(DF)* | *p* | *F(DF)* | *p* | *F(DF)* | p | *F(DF)* | *p* |
| Hippocampus Anterior | .011(1,161) | .9155 | .681(1,161) | .508 | .036(1,161) | .850 | .293(1,161) | .853 |
| Hippocampus Posterior | .039(1,161) | .843 | 2.73(1,161) | .068 | .002(1,161) | .967 | .01(1,161) | .940 |
| Parahippocampal Gyrus Anterior | .178(1,161) | .674 | .828(1,161) | .439 | .027(1,161) | .870 | .027(1,161) | .870 |
| Parahippocampal Gyrus Posterior | .042(1,84) | .838 | .785(1,93) | .459 | .0001,84) | .987 | .289(1,155) | .598 |
| Medial Prefrontal Cortex | .038(1,87) | .846 | 2.93(1,95) | .058 | 1.71(1,87) | .194 | .090(1,160) | .765 |
| Ventrolateral Prefrontal Cortex | .008(1,81) | .928 | 1.04(1,90) | .357 | .625(1,81) | .431 | .029(1,149) | .864 |
| Cerebellum | 1.22(1,161) | .270 | .537(1,161) | .585 | .0001(1,161) | .991 | 1.07(1,161) | .303 |
| Retrosplenial Cortex | .309(1,161) | .579 | .749(1,161) | .474 | .662(1,161) | .417 | .310(1,161) | .579 |
| Precuneus | .323(1,161) | .570 | .856(1,161) | .427 | .621(1,161) | .432 | .007(1,161) | .934 |
| Lateral Occipital Cortex | .001(1,88) | .977 | 1.13(1,96) | .327 | **7.40(1,87)** | **.008** | .000(1,159) | .986 |

*Notes.* *Notes.* Subject was included as random effect. Group (children, young adults), Session (Day 1 remote > recent, Day 14 remote > recent), and their interaction were included as fixed effect. The following reference levels where used: for Session – Day 1; for Group – Children; F – F-value; DF – degrees of freedom; p – p-value; FDR_adj – False Discovery Rate adjusted; R2 – amount of variance explained by the model (∩- marginal; ⊥ - conditional). Type III Analysis of Variance Table with Satterthwaite’s method. *p < .05; ** <.01, ***<.001 (significant difference). All p-values of main and interactions effects were FDR-adjusted for multiple comparisons.

**Mean Signal Differences Between Correct Remote and Recent Memories (without global signal in preprocessing).** The figure presents mean signal difference for remote > recent contrast across sessions and groups during the object presentation time window in **(A)** Anterior and Posterior Hippocampus; (**B**) Anterior and Posterior Parahippocampal Gyrus; **(C)** Cerebellum; **(D)** Medial Prefrontal Cortex; **(E)** Ventrolateral Prefrontal Cortex; **(F)** Precuneus; **(G)** Retrosplenial Cortex; **(H)** Lateral Occipital Cortex. *Note:* Bars indicate the group mean for each session (solid lines for Day 1, dashed lines for Day 14), plotted separately for children and young adults. Error bars represent ±1 standard error of the mean. The colour indicated the age groups: purple for children and khaki yellow for young adults. Across all panels, mean of individual subject data are shown with transparent points. The connecting faint lines reflect within-subject differences across sessions. Orange asterisks denote significant difference of **remote > recent** contrast from zero. An upward orange arrow indicates that this difference is greater than zero, while a downward arrow indicates that this is less than zero. **p* < .05; ***p* < .01; ****p* < .001(significant difference); non-significant differences were not specifically highlighted. Significant main and interaction effects are highlighted by the corresponding asterisks. All main and interaction p-values were FDR-adjusted for multiple comparisons.
