# Supplementary material for: Neural correlates and reinstatement of recent and remote memory in children and young adults
Source: eLife. 2025 Dec 5;12:RP89908. doi: 10.7554/eLife.89908 (PMC12680376; doi:10.7554/eLife.89908)
Supplement: Supplementary file 18. [file elife-89908-supp18.docx]

Supplementary File 18

*Statistical overview of the main and interaction effects of the linear mixed effects model for scene-based univariate neural analysis*

|  | **Main Effect**  **of Group** | | **Main Effect**  **of Delay** | | **Group x Delay Interaction** | |  |
| --- | --- | --- | --- | --- | --- | --- | --- |
| ***Regions of Interest*** | *F(DF)* | p | *F(DF)* | *p* | *F(DF)* | *p* | *R2* |
| HCa | **7.16(1,94)** | **.009** | 2.35(2,238) | .097 | 3.02(2,238) | .051 | .320 |
| HCp | **11.67(1,97)** | **.0009** | **8.25(2,241)** | **.0003** | **7.19(2,241)** | **.0009** | .374 |
| PHGa | **11.02(1,90)** | **.001** | .42(2,234) | .660 | .927(2,234) | .397 | .326 |
| PHGp | .012(1,95) | .914 | **36.46(2,240)** | **<.001** | .749(2,240) | .474 | .377 |
| Medial Prefrontal Cortex | **10.28(1,85)** | **.002** | **7.21(2,163)** | **<.001** | 2.94 (2,163) | .056 | .105 |
| Ventrolateral Prefrontal Cortex | **5.96(1,88)** | **.016** | **55.14(2,164)** | **<.001** | **20.47(2,164)** | **<.001** | .262 |
| Cerebellum | 1.98(1,80) | .163 | **13.63(2,158)** | **<.001** | .065(2,158) | .522 | .084 |
| Retrosplenial Cortex | 1.05(1,88) | .308 | .00(2,164) | .999 | **3.28(2,164)** | **.039** | .023 |
| Precuneus | .19(1,88) | .666 | **12.01(2,163)** | **<.001** | **4.54(2,163)** | **.012** | .056 |
| Lateral Occipital Cortex | **54.52(1,88)** | **<.001** | **17.09(2,163)** | **<.001** | **3.55(2,163)** | **.031** | .338 |

*Notes.* Subject was included as random effect. Group (children, young adults), Delay ( recent, remo te (Day 1), remote (Day 14)), and their interaction were included as fixed effect. The following reference levels where used: for Delay, recent; for Group, Children; mPFC – medial prefrontal cortex; vlPFC – ventrolateral prefrontal cortex; HCa – anterior hippocampus; HCp – posterior hippocampus; PHGa – anterior parahippocampal cortex; PHGp – posterior parahippocampal cortex;CE – cerebellum; PC – precuneus; RSC – retrosplenial cortex; LOC – lateral occipital cortex. F – F-value; DF – degrees of freedom; p – p-value; R2 – amount of variance explained by the model (Stoffel et al., 2021). Type III Analysis of Variance Table with Satterthwaite's method. *p < .05; ** < .01, *** < .001 (significant difference).
